# Supplementary material for: Structure formation of PNIPAM microgels in foams and foam films
Source: Royal Society of Chemistry journal article supplement (doi:10.1039/d2sm01021f), 2022-01-01
Supplement: d2sm01021f1.pdf [file d2sm01021f1.pdf]

# Supporting Information:

## Structure formation of PNIPAM microgels in foams and foam films

Matthias Kühnhammer,<sup>†</sup> Kevin Gräff,<sup>†</sup> Edwin Loran,<sup>†</sup> Olaf Soltwedel,<sup>†</sup> Oliver  
Löhmann,<sup>†</sup> Henrich Frielinghaus,<sup>‡</sup> and Regine von Klitzing<sup>\*,†</sup>

<sup>†</sup>*Institute for Condensed Matter Physics, Technische Universität Darmstadt,  
Hochschulstraße 8, Darmstadt, Germany*

<sup>‡</sup>*Jülich Center for Neutron Science at the Heinz Maier Leibnitz Zentrum,  
Forschungszentrum Jülich GmbH, Lichtenbergstrasse 1, Garching, Germany*

E-mail: [klitzing@smi.tu-darmstadt.de](mailto:klitzing@smi.tu-darmstadt.de)

## AFM scans of spin coated microgels in air

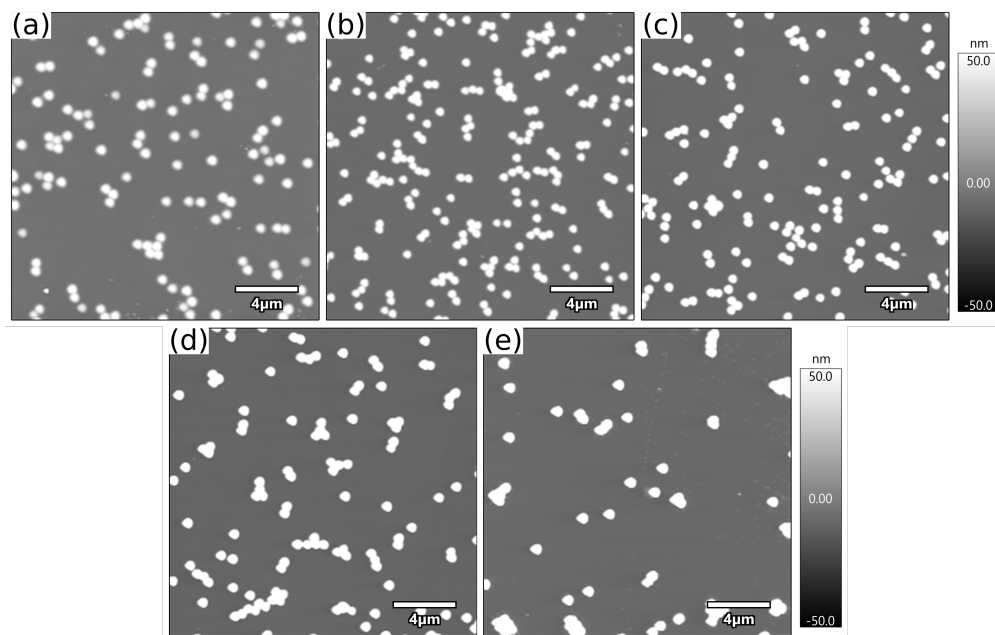

Figure S1: AFM scans of the MG substrates in air. (a) MG2, (b) MG3.5, (c) MG5, (d) MG7.5, (e) MG10.0.

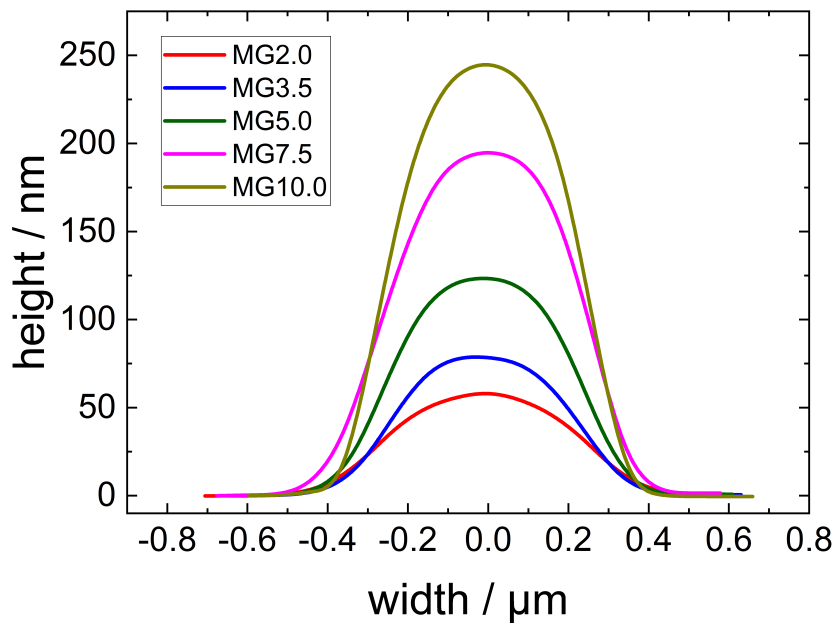

Figure S2: Representative height profiles of all MGs in air.

## Foam decay at room temperature

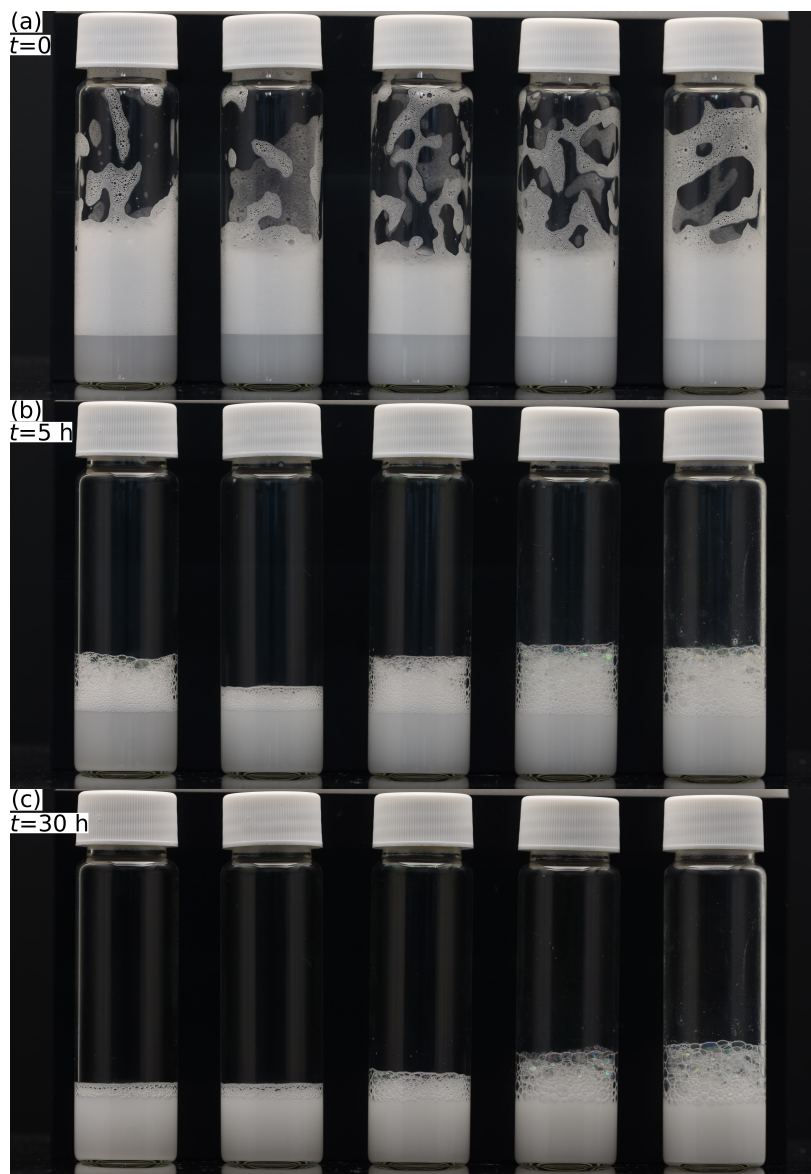

Figure S3: Exemplary foam decay at  $T = 22\text{ }^{\circ}\text{C}$  for the different MGs studied at a concentration of  $w = 1.0\text{ wt}\%$ . (a) Immediately after foam formation, (b) after 5 h and (c) after 30 h. Samples are MG2.0, MG3.5, MG5.0, MG7.5 and MG10.0 from left to right.

## Porod plots at higher MG concentrations

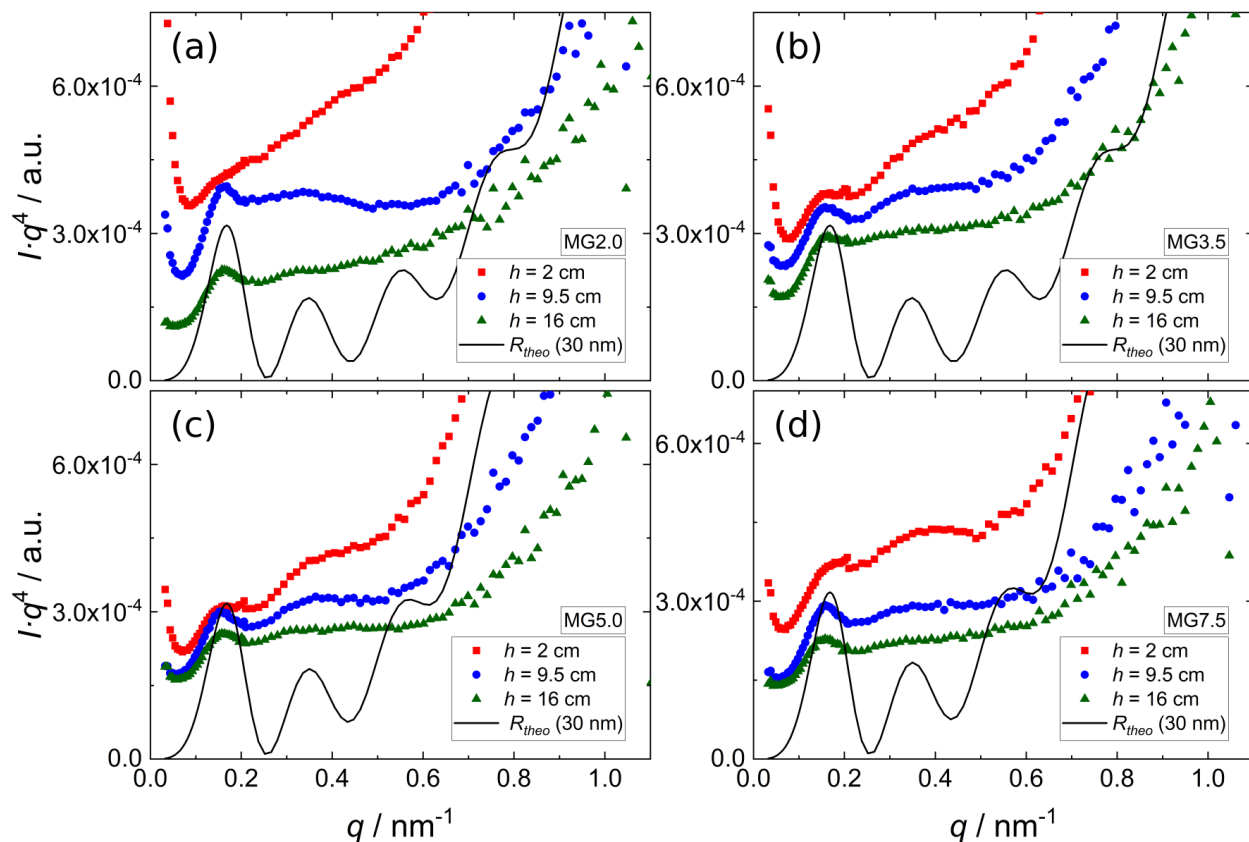

Figure S4: Porod plots of SANS data of foams prepared from 0.5 wt% dispersions of (a) MG2.0, (b) MG3.5, (c) MG5.0, (d) MG7.5, measured at different foam heights (red squares ( $h = 2$  cm), blue circles ( $h = 9.5$  cm) and green triangles ( $h = 16$  cm)). The curves are shifted in intensity for clarity. For comparison a theoretical reflectivity curve of a 30 nm film in air with a SLD contrast of  $\rho_{\text{film}} = 4.5 \times 10^{-6} \text{ \AA}^{-2}$  is shown (black line).

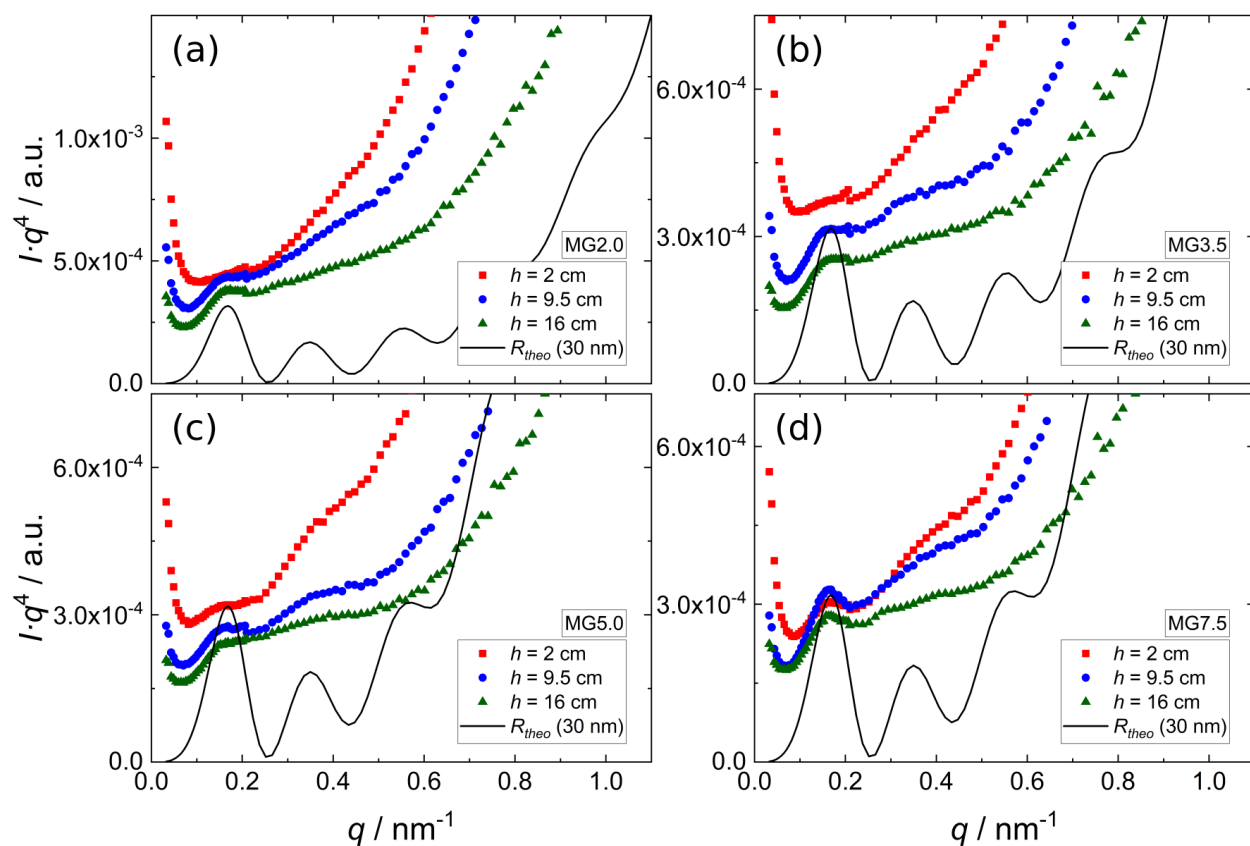

Figure S5: Porod plots of SANS data of foams prepared from 1.0 wt% dispersions of (a) MG2.0, (b) MG3.5, (c) MG5.0, (d) MG7.5, measured at different foam heights (red squares ( $h = 2$  cm), blue circles ( $h = 9.5$  cm) and green triangles ( $h = 16$  cm)). The curves are shifted in intensity for clarity. For comparison a theoretical reflectivity curve of a 30 nm film in air with a SLD contrast of  $\rho_{\text{film}} = 4.5 \times 10^{-6} \text{ \AA}^{-2}$  is shown (black line).

## Evolution of the foam film structure upon pressure release

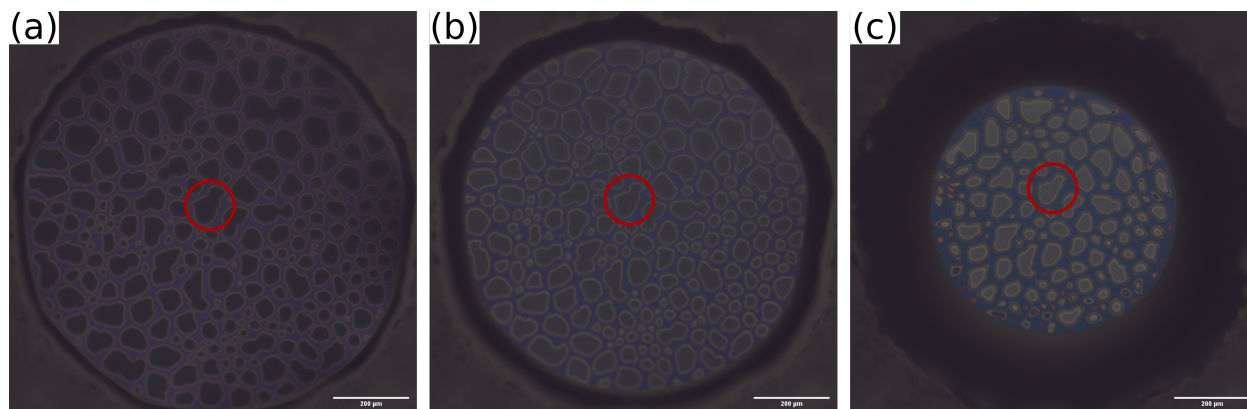

Figure S6: Evolution of the foam film structure upon pressure release of a foam film stabilised by 0.3 wt% MG5.0. (a) foam film structure at  $\Pi = 760$  Pa immediately before the pressure was released. Structure 5 min (b) and 10 min (c) after the pressure release. The shape of the thinner film areas remains constant (highlighted with red circle).

## Force curves for the determination of E moduli

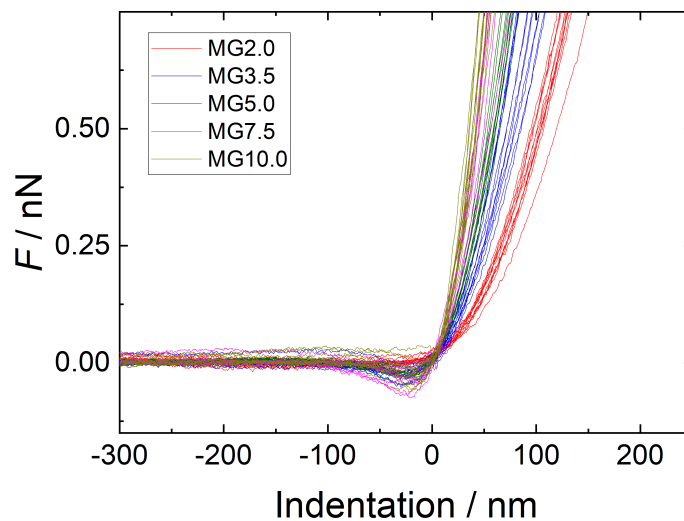

Figure S7: All force curves used for the determination of the elastic moduli given in Figure 11.

## Correlation between foam film thickness and MG size

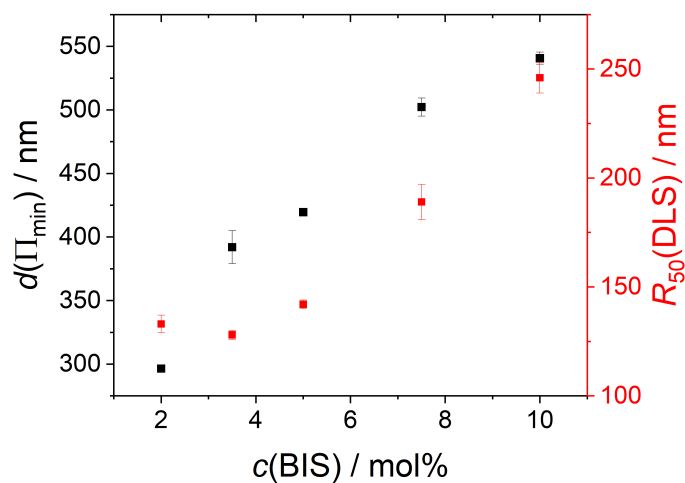

Figure S8: Foam film thickness at the lowest disjoining pressure  $d(\Pi_{\min})$  (black squares, left ordinate) and hydrodynamic radius  $R_{50}$  (red circles, right ordinate) as a function the cross-linker concentration  $c(\text{BIS})$ .
